# Supplementary material for: Serum uric acid levels in patients with amyotrophic lateral sclerosis: a meta-analysis
Source: PubMed Central journal article supplement (PMC5773600; doi:10.1038/s41598-018-19609-2), 2018-01-18
Supplement: 41598_2018_19609_MOESM1_ESM.pdf [file 41598_2018_19609_MOESM1_ESM.pdf]

## **Serum uric acid levels in patients with amyotrophic lateral sclerosis: a meta-analysis**

Fan Zhang<sup>1</sup>, Qin Zhang<sup>1</sup>, Yaqiong Ke<sup>1</sup>, Jianbo Hao<sup>1</sup>, Ling Lu<sup>1</sup>, Nannan Lu<sup>1</sup> & Xiling Chen<sup>2\*</sup>

<sup>1</sup> Department of Geriatrics, The Second Affiliated Hospital of Zhengzhou University, Zhengzhou 450014, China

<sup>2</sup> Department of Geriatrics, The Second Affiliated Hospital of Zhengzhou University, Zhengzhou 450014, China. E-mail: chenxiling412@126.com

\* Corresponding author: Xiling Chen, E-mail: chenxiling412@126.com, Tel/Fax: +86 371 63620506

## **Supplementary materials**

**Table S1.** Characteristics of the included case-control studies

**Table S2.** Characteristics of the included cohort studies

**Fig S1.** Sensitivity analysis for the pooled SMD

**Fig S2.** Sensitivity analysis for the pooled RR

Table S1. Characteristics of included case-control studies

| First author | Year | Study location | ALS definition | ALS |                 | Control |                 | Variables controlled                                                             | NOS score |
|--------------|------|----------------|----------------|-----|-----------------|---------|-----------------|----------------------------------------------------------------------------------|-----------|
|              |      |                |                | N   | UA (Mean±SD)    | N       | UA (Mean±SD)    |                                                                                  |           |
| Sohmiya      | 2005 | Japan          | EEC            | 20  | 266±69µmol/L    | 20      | 298±80µmol/L    | Age and gender                                                                   | 6         |
| Keiman       | 2009 | Israel         | EEC            | 86  | 4.78±1.3mg/dl   | 86      | 5.76±1.3 mg/dl  | Age, gender, BMI, smoking, cardiovascular risk, chronic disease, and medications | 7         |
| Zoccolella   | 2011 | Italy          | EEC and REEC   | 132 | 4.5±1.48 mg/dl  | 337     | 4.8±1.48 mg/dl  | Age and gender                                                                   | 8         |
| Ikeda        | 2012 | Japan          | REEC           | 92  | 4.1±1.1 mg/dl   | 92      | 5.2±1.5 mg/dl   | Age, gender, and BMI                                                             | 6         |
| Zheng        | 2014 | China          | REEC           | 512 | 5.0±1.5 mg/dl   | 501     | 6.5±1.3 mg/dl   | Age and gender                                                                   | 7         |
| Oh           | 2015 | Korea          | REEC           | 136 | 4.50±1.17 mg/dl | 136     | 5.51±1.22 mg/dl | Age, gender and BMI                                                              | 7         |
| Nagase       | 2016 | Japan          | REEC           | 26  | 215±94µmol/L    | 55      | 314±93µmol/L    | Age and gender                                                                   | 6         |
| Duan         | 2016 | China          | REEC           | 164 | 310±88µmol/L    | 164     | 356±78µmol/L    | Age and gender                                                                   | 7         |

ALS=Amyotrophic lateral sclerosis; EEC=El Escorial criteria; EECR=Revised El Escorial criteria; UA=Uric acid; SD=standard derivation; BMI=Body mass index; NOS= Newcastle-Ottawa Scale

**Table S2.** Characteristics of the included cohort studies

| <b>First author</b> | <b>Year</b> | <b>Study location</b>                 | <b>ALS definition</b> | <b>Duration of follow-up (months)</b> | <b>Study size</b> | <b>UA comparison</b>                                              | <b>Adjusted variables</b>                                                         | <b>NOS score</b> |
|---------------------|-------------|---------------------------------------|-----------------------|---------------------------------------|-------------------|-------------------------------------------------------------------|-----------------------------------------------------------------------------------|------------------|
| Zheng               | 2014        | China                                 | REEC                  | 21.3                                  | 512               | Highest quartile vs. lowest quartile (>7.6mg/dl vs. <5.6 umol/l ) | Age at onset, gender, disease duration, and BMI                                   | 8                |
| O'Reilly            | 2016        | Europe, North America, and Australia, | EEC                   | 12                                    | 941               | High halves vs. low halves (>5.1mg/dl vs. < 5.1mg/dl )            | Age, gender, ALSFRS-R, disease duration, riluzole use, the site of onset, and BMI | 7                |
| Paganoni            | 2017        | Europe, USA, and Japan                | EEC and REEC          | 19                                    | 1736              | HR for per unit increase                                          | Age, gender, diagnostic delay, creatinine, and BMI                                | 8                |

ALS=Amyotrophic lateral sclerosis; EEC=El Escorial criteria; EECR=Revised El Escorial criteria; UA=Uric acid; HR=hazard ratio; ALSFRS-R=ALS Functional Rating Scale-Revised; BMI=Body mass index; NOS= Newcastle-Ottawa Scale

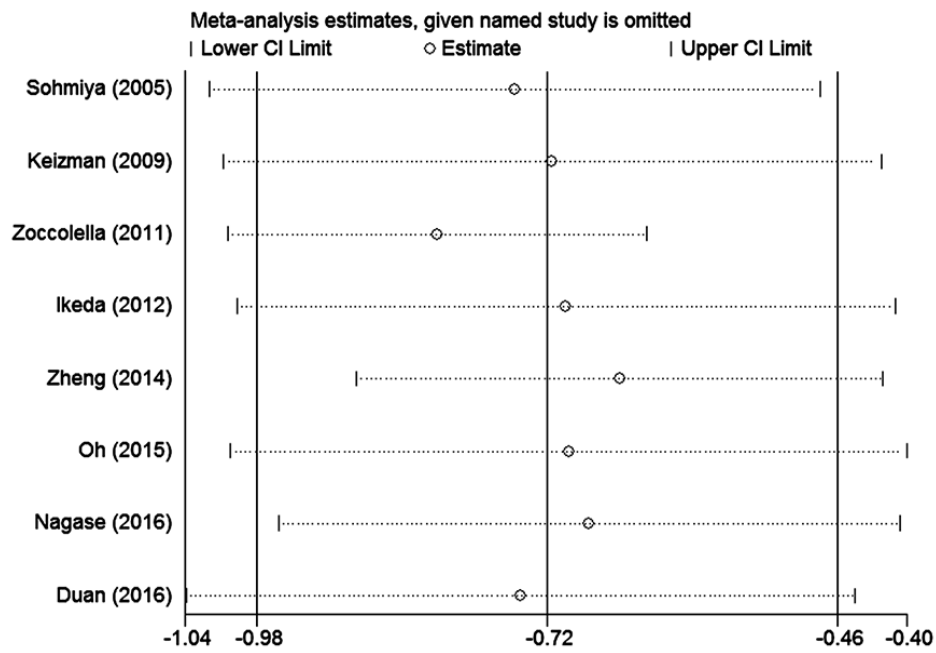

**Fig S1.** Sensitivity analysis for the pooled SMD

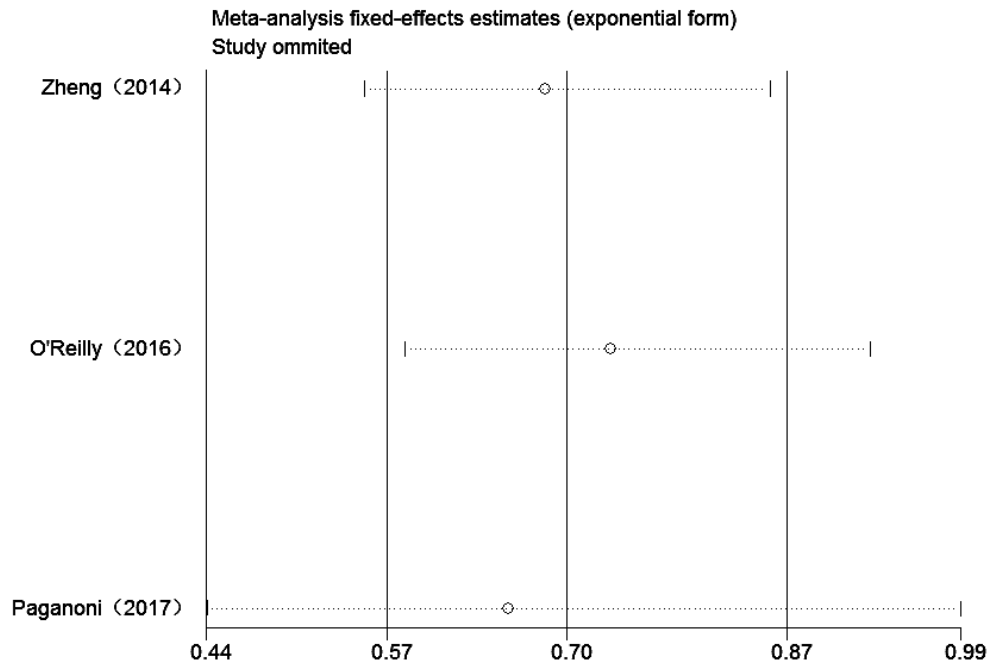

**Fig S2.** Sensitivity analysis for the pooled RR
